# Supplementary material for: PREDICT underestimates survival of patients with HER2-positive early-stage breast cancer
Source: PubMed Central journal article supplement (PMC9300724; doi:10.1038/s41523-022-00452-8), 2022-07-20
Supplement: 41523_2022_452_MOESM1_ESM.pdf [file 41523_2022_452_MOESM1_ESM.pdf]

### ROC at time t=5, AUC=61.7

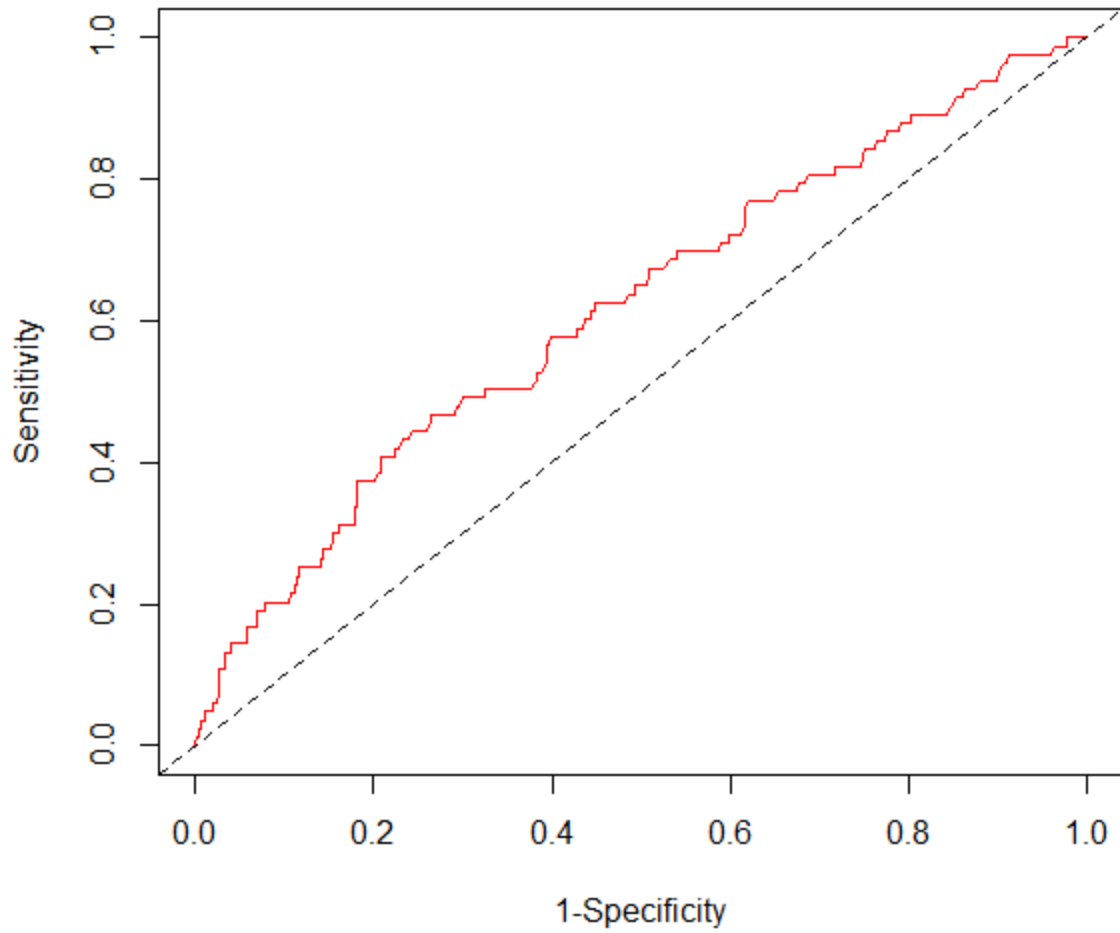

**Supplementary Figure 1.** Discriminatory accuracy of PREDICT+ in patients with  $\geq 4$  positive lymph nodes.

Abbreviations: ROC: receiver-operator characteristic; AUC: area under curve.

**ROC at time t=5, AUC=64.8**

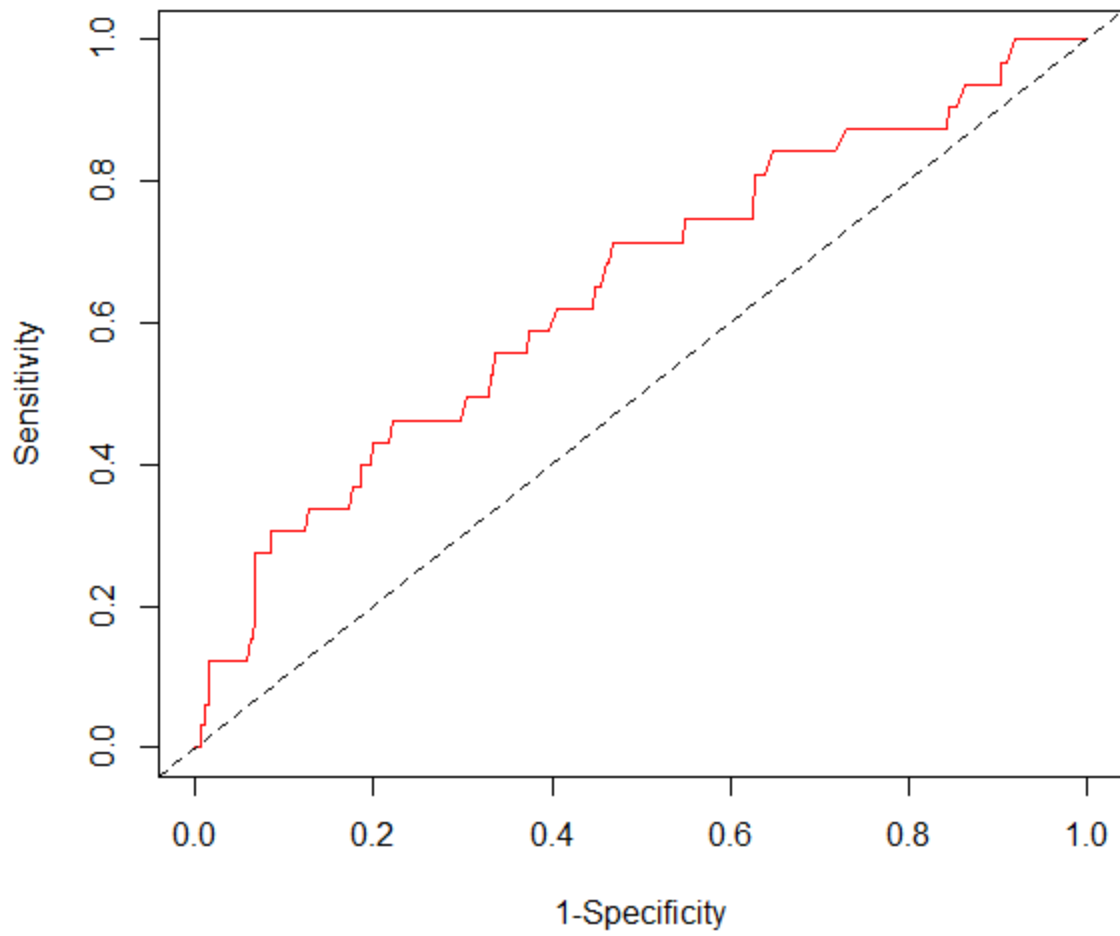

**Supplementary Figure 2.** Discriminatory accuracy of PREDICT+ in patients with 1-3 positive lymph nodes.

Abbreviations: ROC: receiver-operator characteristic; AUC: area under curve.

**ROC at time t=5, AUC=77.3**

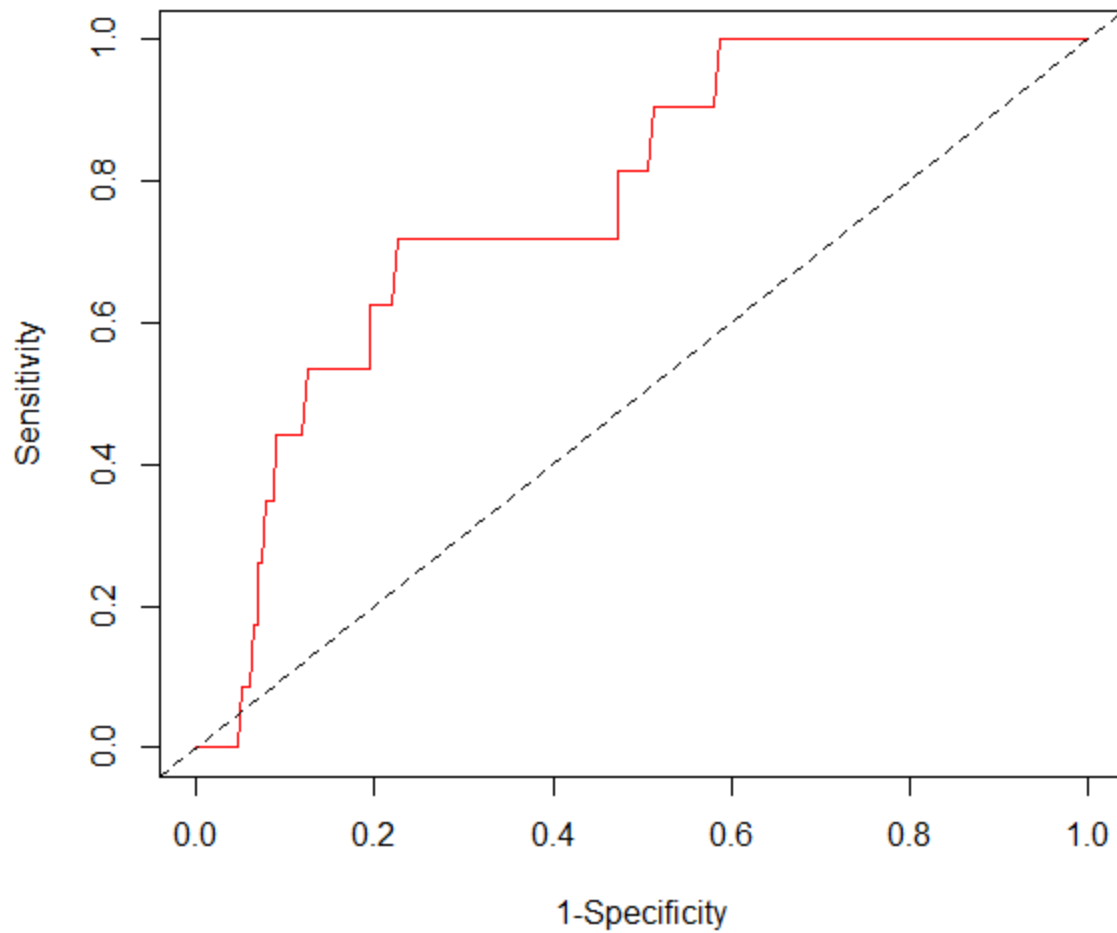

**Supplementary Figure 3.** Discriminatory accuracy of PREDICT+ in patients with negative lymph nodes.

Abbreviations: ROC: receiver-operator characteristic; AUC: area under curve.

**Supplementary Table 1.** Studies and cohorts involving patients with HER2-positive breast cancer used for the development and validation of PREDICT+.

| <b>Study/Cohort</b>                                                                                                                            | <b>Population characteristics</b>                                                  | <b>Aim</b>                                               |
|------------------------------------------------------------------------------------------------------------------------------------------------|------------------------------------------------------------------------------------|----------------------------------------------------------|
| Breast Cancer Association Consortium (BCAC), 2011                                                                                              | N= 10,179, none treated with trastuzumab                                           | Estimates for the prognostic effect of HER2 status       |
| British Columbia dataset, Canada cohort (BJC, 2012)                                                                                            | N=1,653 (HER2-positive n=203), none treated with trastuzumab                       | Validation                                               |
| FinHER (Joensuu et al, 2009)<br>HERA (Smith et al, 2007)<br>B31/N9831 (Romond et al, 2005; Perez et al, 2010)<br>BCIRG006 (Slamon et al, 2011) | Early HER2-positive breast cancer (details for each study are reported in Table 5) | Evaluation and incorporation of benefit from trastuzumab |

**Supplementary Table 2.** Studies providing estimates of trastuzumab benefit for PREDICT+ and comparison with the present study.

| <b>Study</b>                                                | <b>Population</b>                                                                 | <b>Treatment</b>                                                                                                                   | <b>Outcome</b>                                                                                                                                                                        |
|-------------------------------------------------------------|-----------------------------------------------------------------------------------|------------------------------------------------------------------------------------------------------------------------------------|---------------------------------------------------------------------------------------------------------------------------------------------------------------------------------------|
| <b>FinHER</b><br>(Joensuu et al, 2009)                      | node-positive or high-risk node-negative<br><br>N=1010 (overall)<br>N=232 (HER2+) | HER2+ cohort:<br>Arm A: docetaxel(x3) +/- trastuzumab →FEC(x3)<br>Arm B: vinorelbine(x3) +/- trastuzumab →FEC(x3)                  | HER2+ cohort:<br>5-yr OS: 91.3% (CT+trastuzumab) vs 82.3% (CT, no trastuzumab)<br><br>5-yr OS: 94.4% in trastuzumab, docetaxel, FEC cohort vs 82.0% in docetaxel, FEC, no trastuzumab |
| <b>HERA</b><br>(Smith et al, 2007)                          | HER2+ node positive or high-risk node negative breast cancer<br>N=3401            | Standard (neo)adjuvant CT* +/- trastuzumab for 1 year                                                                              | 3-yr OS: 92.4% (trastuzumab) vs 89.7% (no trastuzumab)                                                                                                                                |
| <b>B31/N9831</b><br>(Romond et al, 2005; Perez et al, 2010) | surgically removed HER2+ BC<br>N=3951                                             | AC→paclitaxel +/- trastuzumab                                                                                                      | 4-yr OS: 85.6% in control group and 93.0% in trastuzumab group                                                                                                                        |
| <b>BCIRG006</b><br>(Slamon et al, 2011)                     | HER2+ early BC<br>N=3222                                                          | AC→docetaxel +/- trastuzumab or docetaxel and carboplatin + trastuzumab                                                            | 5-yr OS: 87% (AC→docetaxel) vs 92% (AC→docetaxel + trastuzumab) vs 91% (docetaxel and carboplatin + trastuzumab)                                                                      |
| <b>ALTTO PREDICT+ Study</b>                                 | HER2+ early BC<br>N=2794                                                          | Design 2: Anthracycline→taxane + anti-HER2 (trastuzumab-based)<br>Design 2B: docetaxel+carboplatin + anti-HER2 (trastuzumab-based) | 5-yr observed OS: 95.0%<br>5-yr predicted OS by PREDICT+: 88.0%                                                                                                                       |

\*in 68% of pts anthracycline-based, no taxanes, in 26% anthracyclines+taxanes, 6% no anthracyclines

Abbreviations: HER2+: HER2-positive, FEC: 5-fluorouracil, epirubicin and cyclophosphamide, OS: overall survival, CT: chemotherapy, BC: breast cancer, AC: doxorubicin and cyclophosphamide.
